# Supplementary material
Source: PubMed Central journal article supplement (PMC2909359)
Supplement: NIHMS202400-supplement-supplement_1.pdf [file NIHMS202400-supplement-supplement_1.pdf]

## Supplementary Material

**Table S1. Pax3/7, *pnp4a* and *mitfa:gfp* co-localization analysis**

| time points (hpf) | double positive cells ( <i>pnp4a</i> +/Pax3/7+)    | <i>pnp4a</i> + only     | Pax3/7+ only | % of <i>pnp4a</i> + that are <i>pnp4a</i> +/Pax3/7+       | % of Pax3/7+ that are <i>pnp4a</i> +/Pax3/7+     |
|-------------------|----------------------------------------------------|-------------------------|--------------|-----------------------------------------------------------|--------------------------------------------------|
| 24                | 123                                                | 43                      | 93           | 74                                                        | 57                                               |
| 26                | 98                                                 | 167                     | 347          | 37                                                        | 22                                               |
| 28                | 23                                                 | 121                     | 306          | 16                                                        | 7                                                |
| 50                | 3                                                  | 147                     | 297          | 2                                                         | 1                                                |
| time points (hpf) | double positive cells ( <i>mitfa:gfp</i> /Pax3/7+) | <i>mitfa:gfp</i> + only | Pax3/7+ only | % of <i>mitfa:gfp</i> that are <i>mitfa:gfp</i> +/Pax3/7+ | % of Pax3/7+ that are <i>mitfa:gfp</i> +/Pax3/7+ |
| 24                | 134                                                | 91                      | 57           | 60                                                        | 84                                               |
| 28                | 409                                                | 372                     | 66           | 48                                                        | 78                                               |
| 32                | 122                                                | 95                      | 23           | 46                                                        | 70                                               |
